# Supplementary material
Source: PubMed Central journal article supplement (PMC4138491)
Supplement: NIHMS614302-supplement-supplement_1.pdf [file NIHMS614302-supplement-supplement_1.pdf]

| <b>Project Member Surname</b>                     | <b>First name</b> |
|---------------------------------------------------|-------------------|
| <b>Collaborative Centers</b>                      |                   |
| <b>African Center for Microbiome and Genomics</b> |                   |
| Adebamowo                                         | Clement           |
| Bakare                                            | Rasheed           |
| Akarolo-Anthony                                   | Sally             |
| Obe                                               | Eileen            |
| Goesbeck                                          | Parham            |
| <b>H3Kidney</b>                                   |                   |
| Adu                                               | Dwomoa            |
| Ojo                                               | Akinlolu          |
| Yewondwossen                                      | Mengistu Tadase,  |
| Gbadegesin,                                       | Rasheed           |
| Plange-Rhule,                                     | Jacob             |
| Cooper,                                           | Richard           |
| Tayo,                                             | Bamidele          |
| Arogundade                                        | Fatiu             |
| Ajayi                                             | Samuel            |
| Osafo,                                            | Charlotte         |
| Amodu                                             | Olukemi           |
| Salako,                                           | Tunde             |
| Olanrewaju,                                       | Timothy           |
| Burke,                                            | David             |
| Mc'Ligeyo,                                        | S.O.              |
| Ulasi,                                            | Ifeoma            |
| Parekh,                                           | Rulan             |
| Mamven,                                           | Manmak            |
| Boima,                                            | Vincent           |
| Ekem,                                             | Ivy               |
| Mate-Kole,                                        | Michael           |
| Nyarko,                                           | Alexander         |
| Ademola                                           | Adebowale         |
| Boehnke                                           | Micheal           |
| Brosius,                                          | Frank             |
| Hilderbrandt,                                     | Friedhelm         |
| Kretzler,                                         | Matthias          |
| Moran,                                            | John              |
| Pollak                                            | Martin            |
| Adabayeri                                         | Victoria May      |
| Kopp                                              | Jeffrey           |
| Winkler                                           | Cheryl            |
| <b>CAfGEN</b>                                     |                   |
| Anabwani                                          | Gabriel           |
| Kekitiinwa                                        | Adeodata          |
| Joloba                                            | Moses             |

|                   |                  |
|-------------------|------------------|
| Nkomazana         | Oathokwa         |
| Mpoloka           | "Wata" Sununguko |
| Mardon            | Graeme           |
| Brown             | Chester          |
| Hanchard          | Neil             |
| Kasvosve          | Ishmael          |
| Kyobe             | Samuel           |
| Marape            | Marape           |
| Nsangi            | Betty            |
| Tsimako-Johnstone | Masego           |
| Wayengera         | Misaki           |
| Tukei             | Vincent          |

**Stroke Investigative Research & Educational**

|           |           |
|-----------|-----------|
| Owolabi   | Mayowa    |
| Ovbiagele | Bruce     |
| Lackland  | Daniel    |
| Jenkins   | Carolyn   |
| Akinyemi  | Rufus     |
| Arulogun  | Omoyisola |
| Obiakor   | Reginald  |
| Owolabi   | Lukman    |
| Akpalu    | Albert    |
| Sagoe     | Kwamena   |
| Sarfo     | Stephen   |

**Genomic and Environmental Risk Factors fo**

|             |           |
|-------------|-----------|
|             |           |
| Ramsay      | Michele   |
| Sankoh      | Osman     |
|             |           |
| Agongo      | Godfred   |
| Alberts     | Marianne  |
|             |           |
| Carstens    | Nadia     |
|             |           |
| Crowther    | Nigel     |
|             |           |
| Gomez-Olive | Xavier    |
|             |           |
| Hazelhurst  | Scott     |
| Kahn        | Kathleen  |
|             |           |
| Kyobutungji | Catherine |
|             |           |
| Lombard     | Zane      |
|             |           |
| Norris      | Shane     |

|          |         |
|----------|---------|
| Oduro    | Abraham |
| Soodyall | Himla   |
| Sorgho   | Hermann |
| Tinto    | Halidou |
| Tollman  | Stephen |
| Wade     | Alisha  |

### Research Projects

#### RAFAgene: Contribution of genetic variation

|           |               |
|-----------|---------------|
| Affolabi  | Dissou        |
| Wachinou  | Ablo Prudence |
| Sow Bah   | Oumou         |
| Sarr      | Marie         |
| Mthiyane  | Thuli         |
| McIlleron | Helen         |
| Owen      | Andrew        |
| Merle     | Corinne       |

#### Systems Biology for Molecular Analysis of T

|        |         |
|--------|---------|
| Ameni  | Gobena  |
| Pieper | Rembert |

#### Host and Microbial Genetic Determinants of

|          |              |
|----------|--------------|
| Happi    | Christian    |
| Sabeti   | Pardis       |
| Garry    | Robert       |
| Folarin  | Onikepe      |
| Kahn     | Sheik Humarr |
| Grant    | Donald       |
| Asogun   | Danny        |
| Tobin    | Ekaete       |
| Ndiaye   | Daouda       |
| Yozwiak  | Nathan       |
| Jiang    | Pan-Pan      |
| Baniecki | Mary-Lynn    |
| Winnicki | Sarah        |
| Andersen | Kristian G.  |
| Tareila  | Andrew       |

#### Clinical and genetic studies of hereditary ne

|            |           |
|------------|-----------|
| Landouré   | Guida     |
| Traoré     | Mahamadou |
| Samassékou | Oumar     |
| Fischbeck  | Kenneth   |
| Kleta      | Robert    |

|                                                       |                     |
|-------------------------------------------------------|---------------------|
| Burnett                                               | Barrington          |
| <b>The nasopharyngeal microbiome and respira</b>      |                     |
| Nicol                                                 | Mark                |
| Zar                                                   | Heather             |
| Mulder                                                | Nicola              |
| <b>Reprogramming of the Trypanosoma brucei</b>        |                     |
| Patterton                                             | Hugh                |
| <b>Genomics of Schizophrenia in the South African</b> |                     |
| Stein                                                 | Dan (Prof.)         |
| Ramesar                                               | Raj (Prof.)         |
| Alonso Betancourt                                     | Orlando (Prof.)     |
| Nagdee                                                | Mo (Prof.)          |
| Susser                                                | Ezra (Prof.)        |
| King                                                  | Mary-Claire (Prof.) |
| Lehner                                                | Thomas (Dr.)        |
| <b>ELSI Research Projects</b>                         |                     |
| <b>Exploring Perspectives on Genomics and Si</b>      |                     |
| Wonkam                                                | Ambroise            |
| Makani                                                | Julie               |
| Ohene-Frempong                                        | Kwaku               |
| <b>Mc Curdy</b>                                       | Sheryl              |
| Treadwell                                             | Marsha              |
| <b>Tangwa</b>                                         | Godfred             |
| <b>de Vries</b>                                       | Jantina             |
| <b>Ofori Aquah</b>                                    | Solomon             |
| <b>Pilot Biorepository Projects</b>                   |                     |
| <b>NHLS Stellenbosch University Biobank -</b>         |                     |
| Abayomi                                               | Akin                |
| Swanepoel                                             | Carmen              |
| Grewal                                                | Ravnit              |
| van Rooyen                                            | Beverley            |
| Christoffels                                          | Alan                |
| Fakunle                                               | Eyitayo             |
| <b>IHVN H3 African Biorespository (I-HAB) Initia</b>  |                     |
| Abimiku                                               | Alash'le            |

|                                                         |           |
|---------------------------------------------------------|-----------|
| Beiswanger                                              | Christine |
| Croxtan                                                 | Talishiea |
| <b>Establishment of an H3Africa Biorepository</b>       |           |
| Jentsch                                                 | Ute       |
| Reddy                                                   | Shiksha   |
| Kader                                                   | Mukthar   |
| <b>Integrated Biorepository of H3Africa Uganda - II</b> |           |
| Joloba                                                  | Moses     |
| Wayengera                                               | Misaki    |
| Kyobe                                                   | Samuel    |
| Lawlor                                                  | Rita      |
| <b>Bioinformatics Network</b>                           |           |
| <b>H3ABioNet: A Sustainable African Bioinform</b>       |           |

|                   |               |
|-------------------|---------------|
| Mulder            | Nicola        |
| Martin            | Darren        |
| Patterton         | Hugh          |
| Joubert           | Fourie        |
| Hazelhurst        | Scott         |
| Fadlelmola        | Faisal M.     |
| Ibrahim           | Muntaser E.   |
| Nash              | Oyekanmi      |
| Alzohairy         | Ahmed Mansour |
| Kassim            | Samar         |
| Everett           | Dean          |
| Msefula           | Chisomo       |
| Jongeneel         | Victor        |
| Gaseitsiwe        | Simani        |
| Owusu-Dabo        | Ellis         |
| Donkor            | Peter         |
| Brandful          | James         |
| Ghansah           | Anita         |
| Masiga            | Daniel        |
| Fischer           | Anne          |
| Doumbia           | Seydou        |
| Jaufeerally-Fakim | Yasmina       |
| Ouwe Missi Oukem  | Odile         |
| Adebiyi           | Ezekiel       |
| Kumuthini         | Judit         |
| Tastan Bishop     | Ozlem         |
| Tiffin            | Nicki         |
| Gamielien         | Junaid        |
| Christoffels      | Alan          |
| Ulenga            | Nzovu         |
| Makani            | Julie         |
| Lyantagaye        | Sylvester     |
| Benkahla          | Alia          |
| Kayondo           | Jonathan      |
| Hide              | Winston       |
| Ghazal            | Hassan        |
| Alami             | Raouf         |
| Seghrouchni       | Fouad         |
| Ibrahimi          | Azeddine      |
| Moussa            | Ahmed         |

Fouzia  
Gaboun  
Sadki

Radouani  
Fatima  
Khalid

| Institution as should be listed on Marker Paper           |
|-----------------------------------------------------------|
|                                                           |
| <b>omics Research (ACCME)</b>                             |
| Institute of Human Virology Nigeria                       |
| University of Ibadan                                      |
| Institute of Human Virology Nigeria                       |
| Institute of Human Virology Nigeria                       |
| Center for Infectious Disease Research, Zambia            |
|                                                           |
| Noguchi Institute                                         |
| University of Michigan                                    |
| Addis Ababa University                                    |
| Duke University                                           |
| Kwame Nkrumah University                                  |
| Loyola University Chicago                                 |
| Loyola University Chicago                                 |
| Obafemi Awolowo University                                |
| University of Abuja                                       |
| University of Ghana                                       |
| University of Ibadan                                      |
| University of Ibadan                                      |
| University of Ilorin                                      |
| University of Michigan                                    |
| University of Nairobi                                     |
| University of Nigeria                                     |
| University of Toronto                                     |
| University of Abuja                                       |
| University of Ghana                                       |
| University of Ibadan                                      |
| University of Michigan                                    |
| University of Michigan                                    |
| Havard Medical School                                     |
| University of Michigan                                    |
| University of Michigan                                    |
| Havard Medical School                                     |
| Korle Bu                                                  |
| NIDDK/NIH                                                 |
| NIH                                                       |
|                                                           |
| Botswana-Baylor Children's Clinical Centre of Excellence  |
| Baylor College of Medicine Children's Foundation - Uganda |
| Makerere University                                       |

|                                                                                                                                                                                                                                         |
|-----------------------------------------------------------------------------------------------------------------------------------------------------------------------------------------------------------------------------------------|
| Univerity of Botswana                                                                                                                                                                                                                   |
| University of Botswana                                                                                                                                                                                                                  |
| Baylor College of Medicine                                                                                                                                                                                                              |
| Baylor College of Medicine                                                                                                                                                                                                              |
| Baylor College of Medicine                                                                                                                                                                                                              |
| University of Botswana                                                                                                                                                                                                                  |
| Makerere University                                                                                                                                                                                                                     |
| Botswana-Baylor Children's Clinical Centre of Excellence                                                                                                                                                                                |
| Baylor College of Medicine Children's Foundation - Uganda                                                                                                                                                                               |
| University of Botswana                                                                                                                                                                                                                  |
| Makerere University                                                                                                                                                                                                                     |
| Baylor College of Medicine Children's Foundation - Uganda                                                                                                                                                                               |
| <b>I Network (SIREN)</b>                                                                                                                                                                                                                |
| University of Ibadan                                                                                                                                                                                                                    |
| Medical University of South Carolina                                                                                                                                                                                                    |
| Medical University of South Carolina                                                                                                                                                                                                    |
| Medical University of South Carolina                                                                                                                                                                                                    |
| Federal Medical Centre, Abeokuta                                                                                                                                                                                                        |
| University of Ibadan                                                                                                                                                                                                                    |
| Ahmadu Bello University                                                                                                                                                                                                                 |
| Aminu Kano University                                                                                                                                                                                                                   |
| University of Ghana                                                                                                                                                                                                                     |
| University of Ghana                                                                                                                                                                                                                     |
| Kwame Nkrumah University                                                                                                                                                                                                                |
| <b>r Cardiometabolic Disease in Africans (AWI-Gen)</b>                                                                                                                                                                                  |
| Sydney Brenner Institute for Molecular Bioscience, University of the Witwatersrand, Division of Human Genetics, National Health Laboratory Service and School of Pathology, Faculty of Health Sciences, Univeristy of the Witwatersrand |
| INDEPTH Network                                                                                                                                                                                                                         |
|                                                                                                                                                                                                                                         |
| Navrongo Health Research Centre, Box 114, Navrongo-Ghana                                                                                                                                                                                |
| INDEPTH, Dikgale                                                                                                                                                                                                                        |
|                                                                                                                                                                                                                                         |
| University of Witwatersrand                                                                                                                                                                                                             |
| Department of Chemical Pathology, National Health Laboratoy Service, Faculty of Health Sciences, University of the Witwatersrand                                                                                                        |
|                                                                                                                                                                                                                                         |
| INDEPTH, Agincourt                                                                                                                                                                                                                      |
|                                                                                                                                                                                                                                         |
| School of Electrical & Information Engineering, Wits Bioinformatics, Sydney Brenner Institute for Molecular Bioscience, University of the Witwatersrand                                                                                 |
| INDEPTH, Agincourt                                                                                                                                                                                                                      |
|                                                                                                                                                                                                                                         |
| INDEPTH, African Population and Health Research Center, Nairobi, Kenya                                                                                                                                                                  |
| Wits Bioinformatics & School of Molecular and Cell Biology, Faculty of Science, University of the Witwatersrand                                                                                                                         |
| MRC/Wits Developmental Pathways for Health Research Unit, Faculty of Health Sciences, University of the Witwatersrand                                                                                                                   |



|                                                                                               |
|-----------------------------------------------------------------------------------------------|
| INDEPTH, Navrongo Health Research Centre, Box 114, Navrongo, Ghana                            |
| National Health Laboratory Service and University of Witwatersrand                            |
| Institut de Recherche en Sciences de la Sante, Clinical Research Unit of Nanoro, Burkina Faso |
| INDEPTH, Nanoro                                                                               |
| INDEPTH, Agincourt                                                                            |
| University of Witwatersrand                                                                   |

**to pharmacokinetic variability and toxicity in patients undergoing multi-**

|                                                                      |
|----------------------------------------------------------------------|
| National Hospital for Tuberculosis and Pulmonary Diseases, Benin     |
| National Hospital for Tuberculosis and Pulmonary Diseases, Benin     |
| Ignace Deen Hospital, Conakry Guinea                                 |
| National Tuberculosis Programme, Senegal                             |
| Global Clinical and Viral Laboratories, Kwa Zulu Natal, South Africa |
| University of Cape Town, South Africa                                |
| University of Liverpool, United Kingdom                              |
| London School of Hygiene and Tropical Medicine, United Kingdom       |

**uberculosis in Ethiopia (TrypanoGEN)**

|                           |
|---------------------------|
| Addis Ababa University    |
| J. Craig Venter Institute |

**Febrile Illness in West Africa**

|                                             |
|---------------------------------------------|
| Redeemer's University                       |
| Broad Institute of Harvard and MIT          |
| Tulane University                           |
| Redeemer's University                       |
| Kenema Government Hospital, Sierra Leone    |
| Kenema Government Hospital, Sierra Leone    |
| Irrua Specialist Teaching Hospital, Nigeria |
| Irrua Specialist Teaching Hospital, Nigeria |
| Cheikh Anta Diop Univeristy, Senegal        |
| Broad Institute of Harvard and MIT          |

**urological disorders in Mali**

|                                                                          |
|--------------------------------------------------------------------------|
| Université des Sciences, des Techniques et des Technologies de Bamako, B |
| Université des Sciences, des Techniques et des Technologies de Bamako, B |
| Manitoba Institute of cell Biology, Winnipeg, Canada                     |
| Neurogenetics Branch/NINDS/NIH, Bethesda, MD, USA                        |
| Centre for Nephrology, University College London, London, UK             |

|                                                                                                                                                                                                                                                 |
|-------------------------------------------------------------------------------------------------------------------------------------------------------------------------------------------------------------------------------------------------|
| Department of Anatomy, Physiology and Genetics, Uniformed Services University of the Health Sciences                                                                                                                                            |
| <b>Genetic epidemiology of infectious disease in African children</b>                                                                                                                                                                           |
| University of Cape Town                                                                                                                                                                                                                         |
| University of Cape Town                                                                                                                                                                                                                         |
| University of Cape Town                                                                                                                                                                                                                         |
| <b>Epigenome during human infection: opportunities for new therapies</b>                                                                                                                                                                        |
| University of Free State                                                                                                                                                                                                                        |
| University of Free State                                                                                                                                                                                                                        |
| University of Cape Town                                                                                                                                                                                                                         |
| University of Cape Town                                                                                                                                                                                                                         |
| Walter Sisulu University                                                                                                                                                                                                                        |
| Rhodes University                                                                                                                                                                                                                               |
| Columbia University, USA                                                                                                                                                                                                                        |
| Washington University, USA                                                                                                                                                                                                                      |
| National Institute of Health, USA                                                                                                                                                                                                               |
|                                                                                                                                                                                                                                                 |
| <b>Sickle Cell Public Health Intervention</b>                                                                                                                                                                                                   |
| University of Cape Town                                                                                                                                                                                                                         |
| Muhimbili University of Health and Allied Sciences (MUHAS), Tanzania                                                                                                                                                                            |
| Children's Hospital of Philadelphia and Sickle Cell Foundation of Ghana                                                                                                                                                                         |
| University of Texas Houston – Texas, USA                                                                                                                                                                                                        |
| Children's Hospital Oakland Research Institute, California USA                                                                                                                                                                                  |
| University of Yaounde I, Cameroon                                                                                                                                                                                                               |
| University of Cape Town, Faculty of Health Sciences, South Africa                                                                                                                                                                               |
| Center for Translational and International Hematology Vascular Medicine Institute, University of California San Diego                                                                                                                           |
|                                                                                                                                                                                                                                                 |
| <b>H3Africa (NSB-H3A)</b>                                                                                                                                                                                                                       |
| 1.National Health Laboratory Services,Tygerberg Hospital Business Unit, Cape Town, South Africa<br>2.Division of Haematology, Department of Pathology, Stellenbosch University Faculty of Medicine and Health Sciences, Tygerberg, South Africa |
| 1.National Health Laboratory Services,Tygerberg Hospital Business Unit, Cape Town, South Africa<br>2.Division of Haematology, Department of Pathology, Stellenbosch University Faculty of Medicine and Health Sciences, Tygerberg, South Africa |
| 1.National Health Laboratory Services,Tygerberg Hospital Business Unit, Cape Town, South Africa<br>2.Division of Haematology, Department of Pathology, Stellenbosch University Faculty of Medicine and Health Sciences, Tygerberg, South Africa |
| Division of Haematology, Department of Pathology, Stellenbosch University Faculty of Medicine and Health Sciences, Tygerberg, South Africa                                                                                                      |
| South African Medical Research Council Bioinformatics Unit, South African National Bioinformatics Institute, University of the Western Cape, Robert Sobukwe Road, Bellville, South Africa                                                       |
| Department of Chemical Physiology, Centre for Regenerative Medicine, The Scripps Research Institute, La Jolla, Ca, USA                                                                                                                          |
| <b>Genetic epidemiology of infectious disease in African children</b>                                                                                                                                                                           |
| Institute of Human Virology Nigeria                                                                                                                                                                                                             |

|                                                                               |
|-------------------------------------------------------------------------------|
| Coriell Institute for Medical Research                                        |
| Institute of Human Virology Nigeria                                           |
| <b>at Contract Laboratory Services</b>                                        |
| Clinical Laboratory Services                                                  |
| Clinical Laboratory Services                                                  |
| Clinical Laboratory Services                                                  |
| BRH3AU                                                                        |
| Makerere University                                                           |
| Makerere University                                                           |
| Makerere University                                                           |
| University of Verona                                                          |
|                                                                               |
| <b>atics Network for H3Africa</b>                                             |
| Computational Biology Group, IDM, Faculty of Health Sciences, University of   |
| Computational Biology Group, IDM, Faculty of Health Sciences, University of   |
| University of the Free State, South Africa                                    |
| University of Pretoria, South Africa                                          |
| University of the Witwatersrand, South Africa                                 |
| Future University of Sudan, Sudan                                             |
| Institute of Endemic Diseases, University of Khartoum, Sudan                  |
| National Biotechnology Development Agency, Nigeria                            |
| Genetics Department, Faculty of Agriculture, Zagazig University, Egypt        |
| Ain Shams University, Egypt                                                   |
| Malawi-Liverpool-Wellcome Clinical Research Programme / Institute of Infecti  |
| Malawi-Liverpool-Wellcome Clinical Research Programme / College of Medici     |
| National Center for Supercomputing Applications and Institute for Genomic Bi  |
| Botswana Harvard AIDS Institute Partnership, Botswana                         |
| Kumasi Centre for Collaborative Research in Tropical Medicine / Kwame Nkr     |
| Kumasi Centre for Collaborative Research in Tropical Medicine / Kwame Nkr     |
| Noguchi Memorial Institute for Medical Research, Ghana                        |
| Noguchi Memorial Institute for Medical Research, Ghana                        |
| International Centre of Insect Physiology and Ecology, Kenya                  |
| International Centre of Insect Physiology and Ecology, Kenya                  |
| University of Sciences, Techniques and Technology of Bamako, USTTB, Mali      |
| University of Mauritius, Mauritius                                            |
| Centre de Recherche Médicale et Sanitaire (CERMES), Niamey, Niger             |
| Covenant University Bioinformatics Research, Nigeria                          |
| Center for Proteomic and Genomic Research, Cape Town, South Africa            |
| Research Unit in Bioinformatics (RUBi), Department of Biochemistry and Micr   |
| South African National Bioinformatics Institute/Medical Research Council of S |
| South African National Bioinformatics Institute/Medical Research Council of S |
| South African National Bioinformatics Institute/Medical Research Council of S |
| Management and Development for Health, Tanzania                               |
| Muhimbili University of Health and Allied Sciences, Tanzania                  |
| University of Dar es Salaam, Tanzania                                         |
| Institut Pasteur of Tunis, Tunisia                                            |
| Uganda Virus Research Institute, Uganda                                       |
| Harvard School of Public Health, USA                                          |
| University Mohammed First, Morocco                                            |
| Centre National de Transfusion Sanguine, Morocco                              |
| Institut National d'Hygiène du Maroc, Morocco                                 |
| Faculté de Médecine et de Pharmacie de Rabat, Université Mohammed V So        |
| Ecole Nationale des Sciences Appliquées, Abdelmalek Essaadi University, M     |

Institut Pasteur du Maroc, Morocco

Institut National de Recherche Agronomique, Morocco

Faculty of Sciences of Rabat, University Mohammed V- Agdal, Morocco

**Contact email**[cadebamo@yahoo.com](mailto:cadebamo@yahoo.com)[rabakare@yahoo.com](mailto:rabakare@yahoo.com)[sna094@yahoo.com](mailto:sna094@yahoo.com)[eobe@ihvnigeria.org](mailto:eobe@ihvnigeria.org)[professorparham@hotmail.com](mailto:professorparham@hotmail.com)[dwoms15@gmail.com](mailto:dwoms15@gmail.com)[aajo@umich.edu](mailto:aajo@umich.edu)[yewondt@yahoo.com](mailto:yewondt@yahoo.com)[rasheed.gbadegesin@duke.edu](mailto:rasheed.gbadegesin@duke.edu)[jplange@sgul.ac.uk](mailto:jplange@sgul.ac.uk)[rcooper@lumc.edu](mailto:rcooper@lumc.edu)[btayo@lumc.edu](mailto:btayo@lumc.edu)[fatiu3@yahoo.com](mailto:fatiu3@yahoo.com)[soajayi@hotmail.com](mailto:soajayi@hotmail.com)[ceyosafo@gmail.com](mailto:ceyosafo@gmail.com)[amkemi@hotmail.com](mailto:amkemi@hotmail.com)[tundesalako@hotmail.com](mailto:tundesalako@hotmail.com)[timothysegun@yahoo.com](mailto:timothysegun@yahoo.com)[dtburke@umich.edu](mailto:dtburke@umich.edu)[mcligevo@yahoo.com](mailto:mcligevo@yahoo.com)[lfeomaulasi@yahoo.co.uk](mailto:lfeomaulasi@yahoo.co.uk)[ruan.parekh@sickkids.ca](mailto:ruan.parekh@sickkids.ca)[manmakm@yahoo.com](mailto:manmakm@yahoo.com)[vbom2000@yahoo.com](mailto:vbom2000@yahoo.com)[ekem\\_ivy@hotmail.com](mailto:ekem_ivy@hotmail.com)[osom7@hotmail.com](mailto:osom7@hotmail.com)[anyarko@noguchi.mimcom.org](mailto:anyarko@noguchi.mimcom.org)[dr\\_deboademola@yahoo.co.uk](mailto:dr_deboademola@yahoo.co.uk)[boehnke@umich.edu](mailto:boehnke@umich.edu)[fbrosius@med.umich.edu](mailto:fbrosius@med.umich.edu)[kretzler@med.umich.edu](mailto:kretzler@med.umich.edu)[moranj@umich.edu](mailto:moranj@umich.edu)[mpollak@bidmc.harvard.edu](mailto:mpollak@bidmc.harvard.edu)[viggimay@yahoo.co.uk](mailto:viggimay@yahoo.co.uk)[jbkopp@nih.gov](mailto:jbkopp@nih.gov)[winklerc@mail.nih.gov](mailto:winklerc@mail.nih.gov)[ganabwani@baylorbotswana.org.bw](mailto:ganabwani@baylorbotswana.org.bw)[akekitiinwa@baylor-uganda.org](mailto:akekitiinwa@baylor-uganda.org)[m.joloba@gmail.com](mailto:m.joloba@gmail.com)

|                                                                                  |
|----------------------------------------------------------------------------------|
| <a href="mailto:nkomazanao@mopipi.ub.bw">nkomazanao@mopipi.ub.bw</a>             |
| <a href="mailto:mpoloka@mopipi.ub.bw">mpoloka@mopipi.ub.bw</a>                   |
| <a href="mailto:gmardon@bcm.edu">gmardon@bcm.edu</a>                             |
| <a href="mailto:cbrown@bcm.edu">cbrown@bcm.edu</a>                               |
| <a href="mailto:hanchard@bcm.edu">hanchard@bcm.edu</a>                           |
| <a href="mailto:Ishmael.Kasvosve@mopipi.ub.bw">Ishmael.Kasvosve@mopipi.ub.bw</a> |
| <a href="mailto:samuelkyobe@gmail.com">samuelkyobe@gmail.com</a>                 |
| <a href="mailto:mmarape@gmail.com">mmarape@gmail.com</a>                         |
| <a href="mailto:bnsangi@baylor-uganda.org">bnsangi@baylor-uganda.org</a>         |
| <a href="mailto:masego.johnstone@mopipi.ub.bw">masego.johnstone@mopipi.ub.bw</a> |
| <a href="mailto:wmisaki@yahoo.com">wmisaki@yahoo.com</a>                         |
| <a href="mailto:vtukei@baylor-uganda.org">vtukei@baylor-uganda.org</a>           |

|                                                                          |
|--------------------------------------------------------------------------|
| <a href="mailto:mayowaowolabi@yahoo.com">mayowaowolabi@yahoo.com</a>     |
| <a href="mailto:ovibes@musc.edu">ovibes@musc.edu</a>                     |
| <a href="mailto:lackland@musc.edu">lackland@musc.edu</a>                 |
| <a href="mailto:jenkinsc@musc.edu">jenkinsc@musc.edu</a>                 |
| <a href="mailto:rufusakinyemi@yahoo.com">rufusakinyemi@yahoo.com</a>     |
| <a href="mailto:omoyisola2002@yahoo.com">omoyisola2002@yahoo.com</a>     |
| <a href="mailto:orobiakor87@gmail.com">orobiakor87@gmail.com</a>         |
| <a href="mailto:drlukmanowolabi@yahoo.com">drlukmanowolabi@yahoo.com</a> |
| <a href="mailto:a_akpalu@yahoo.com">a_akpalu@yahoo.com</a>               |
| <a href="mailto:kwamenas@hotmail.com">kwamenas@hotmail.com</a>           |
| <a href="mailto:stephensarfo78@gmail.com">stephensarfo78@gmail.com</a>   |

[michele.ramsay@nhls.ac.za](mailto:michele.ramsay@nhls.ac.za) or  
[michele.ramsay@wits.ac.za](mailto:michele.ramsay@wits.ac.za)  
[osman.sankoh@indepth-network.org](mailto:osman.sankoh@indepth-network.org)

[Godfred.Agongo@navrongo-hrc.org](mailto:Godfred.Agongo@navrongo-hrc.org)

[Marianne.alberts@ul.ac.za](mailto:Marianne.alberts@ul.ac.za)

[Nadia.Carstens@wits.ac.za](mailto:Nadia.Carstens@wits.ac.za)

[Nigel.crowther@nhls.ac.za](mailto:Nigel.crowther@nhls.ac.za)

[F.Gomez-OliveCasas@wits.ac.za](mailto:F.Gomez-OliveCasas@wits.ac.za)

[Scott.Hazelhurst@wits.ac.za](mailto:Scott.Hazelhurst@wits.ac.za)

[Kathleen.Kahn@wits.ac.za](mailto:Kathleen.Kahn@wits.ac.za)

[ckyobutungi@aphrc.org](mailto:ckyobutungi@aphrc.org)

[zane.lombard@wits.ac.za](mailto:zane.lombard@wits.ac.za)

[san@global.co.za](mailto:san@global.co.za)

[Abraham.oduro@navrongo-hrc.org](mailto:Abraham.oduro@navrongo-hrc.org)

[himla.soodyal@nhls.ac.za](mailto:himla.soodyal@nhls.ac.za)

[hsorgho@hotmail.com](mailto:hsorgho@hotmail.com)

[tintohalidou@yahoo.fr](mailto:tintohalidou@yahoo.fr)

[Stephen.Tollman@wits.ac.za](mailto:Stephen.Tollman@wits.ac.za)

[Alisha.Wade@wits.ac.za](mailto:Alisha.Wade@wits.ac.za)

#### **Drug tuberculosis treatment in Sub-Saharan Africa**

[affolabi\\_dissou@yahoo.fr](mailto:affolabi_dissou@yahoo.fr)

[wachinouprudence@yahoo.fr](mailto:wachinouprudence@yahoo.fr)

[oumou45@yahoo.fr](mailto:oumou45@yahoo.fr)

[drmariesarr@yahoo.fr](mailto:drmariesarr@yahoo.fr)

[thulimthiyane24@gmail.com](mailto:thulimthiyane24@gmail.com)

[Helen.McIlleron@uct.ac.za](mailto:Helen.McIlleron@uct.ac.za)

[aowen@liverpool.ac.uk](mailto:aowen@liverpool.ac.uk)

[corinne.merle@lshtm.ac.uk](mailto:corinne.merle@lshtm.ac.uk)

[gobena.ameni@aau.edu.et](mailto:gobena.ameni@aau.edu.et)

[rpieper@jcv.org](mailto:rpieper@jcv.org)

CHRISTIAN HAPPI ([happic@run.edu.ng](mailto:happic@run.edu.ng))

'[pardis@broadinstitute.org](mailto:pardis@broadinstitute.org)' ([pardis@broadinstitute.org](mailto:pardis@broadinstitute.org))

[rfgarry@tulane.edu](mailto:rfgarry@tulane.edu)

[folarino@run.edu.ng](mailto:folarino@run.edu.ng) ; [onikepefolarin@yahoo.com](mailto:onikepefolarin@yahoo.com)

[ceebaby11@gmail.com](mailto:ceebaby11@gmail.com)

[donkumfel@yahoo.co.uk](mailto:donkumfel@yahoo.co.uk)

[asogun2001@yahoo.com](mailto:asogun2001@yahoo.com)

[ekatobin@yahoo.com](mailto:ekatobin@yahoo.com)

[daouda.ndiaye@ucad.edu.sn](mailto:daouda.ndiaye@ucad.edu.sn)

[nyozwiak@broadinstitute.org](mailto:nyozwiak@broadinstitute.org)

[ppjiang@broadinstitute.org](mailto:ppjiang@broadinstitute.org)

[baniecki@broadinstitute.org](mailto:baniecki@broadinstitute.org)

[sarahw@broadinstitute.org](mailto:sarahw@broadinstitute.org)

[anderson@broadinstitute.org](mailto:anderson@broadinstitute.org)

[tareila@broadinstitute.org](mailto:tareila@broadinstitute.org)

[glandoure@gmail.com](mailto:glandoure@gmail.com)

[seybatraore@yahoo.fr](mailto:seybatraore@yahoo.fr)

[oumar.samassekou@usherbrooke.ca](mailto:oumar.samassekou@usherbrooke.ca)

[fischbek@ninds.nih.gov](mailto:fischbek@ninds.nih.gov)

[r.kleta@ucl.ac.uk](mailto:r.kleta@ucl.ac.uk)

|                                                                                                                                                   |
|---------------------------------------------------------------------------------------------------------------------------------------------------|
| <a href="mailto:barrington.burnett@usuhs.edu">barrington.burnett@usuhs.edu</a>                                                                    |
| <a href="mailto:mark.nicol@uct.ac.za">mark.nicol@uct.ac.za</a>                                                                                    |
| <a href="mailto:heather.zar@uct.ac.za">heather.zar@uct.ac.za</a>                                                                                  |
| <a href="mailto:nicola.mulder@uct.ac.za">nicola.mulder@uct.ac.za</a>                                                                              |
| <a href="mailto:patterh@ufs.ac.za">patterh@ufs.ac.za</a>                                                                                          |
| <a href="mailto:dan.stein@uct.ac.za">dan.stein@uct.ac.za</a>                                                                                      |
| <a href="mailto:raj.ramesar@uct.ac.za">raj.ramesar@uct.ac.za</a>                                                                                  |
| <a href="mailto:orlando@interkom.co.za">orlando@interkom.co.za</a>                                                                                |
| <a href="mailto:drmonagdee@gmail.com">drmonagdee@gmail.com</a>                                                                                    |
| <a href="mailto:ess8@cumc.columbia.edu">ess8@cumc.columbia.edu</a>                                                                                |
| <a href="mailto:mcking@u.washington.edu">mcking@u.washington.edu</a>                                                                              |
| <a href="mailto:tlehner@mail.nih.gov">tlehner@mail.nih.gov</a>                                                                                    |
| Ambroise Wonkam ( <a href="mailto:ambroise.wonkam@uct.ac.za">ambroise.wonkam@uct.ac.za</a> )                                                      |
| <a href="mailto:julie.makani@muhibili-welcome.org">julie.makani@muhibili-welcome.org</a>                                                          |
| <a href="mailto:ohene@sicklecellghana.org">ohene@sicklecellghana.org</a>                                                                          |
| <a href="mailto:sheryl.a.mccurdy@uth.tmc.edu">sheryl.a.mccurdy@uth.tmc.edu</a>                                                                    |
| <a href="mailto:MTreadwell@mail.cho.org">MTreadwell@mail.cho.org</a>                                                                              |
| <a href="mailto:gbtangwa@yahoo.com">gbtangwa@yahoo.com</a>                                                                                        |
| <a href="mailto:jantina.devries@uct.ac.za">jantina.devries@uct.ac.za</a>                                                                          |
| <a href="mailto:sfo2@pitt.edu">sfo2@pitt.edu</a>                                                                                                  |
| Abayomi, AE, Prof < <a href="mailto:abayomi@sun.ac.za">abayomi@sun.ac.za</a> >                                                                    |
| <a href="mailto:carmen@sun.ac.za">carmen@sun.ac.za</a>                                                                                            |
| <a href="mailto:rgrewal@sun.ac.za">rgrewal@sun.ac.za</a>                                                                                          |
| <a href="mailto:bev@sun.ac.za">bev@sun.ac.za</a>                                                                                                  |
| <a href="mailto:alan@sanbi.co.za">alan@sanbi.co.za</a>                                                                                            |
| <a href="mailto:efakunl@yahoo.com">efakunl@yahoo.com</a>                                                                                          |
| <a href="mailto:aabimiku@ihvnigeria.org">aabimiku@ihvnigeria.org</a> ; <a href="mailto:aabimiku@ihv.umaryland.edu">aabimiku@ihv.umaryland.edu</a> |



|                                                                                                                                                   |
|---------------------------------------------------------------------------------------------------------------------------------------------------|
| <a href="mailto:beiswangerc@gmail.com">beiswangerc@gmail.com</a>                                                                                  |
| <a href="mailto:tcroxton@ihvnigeria.org">tcroxton@ihvnigeria.org</a> ; <a href="mailto:tcroxton@ihv.umaryland.edu">tcroxton@ihv.umaryland.edu</a> |
|                                                                                                                                                   |
| <a href="mailto:ujentsch@cls.co.za">ujentsch@cls.co.za</a>                                                                                        |
| <a href="mailto:sreddy@cls.co.za">sreddy@cls.co.za</a>                                                                                            |
| <a href="mailto:mkader@cls.co.za">mkader@cls.co.za</a>                                                                                            |
|                                                                                                                                                   |
| <a href="mailto:moses.joloba@case.edu">moses.joloba@case.edu</a>                                                                                  |
| <a href="mailto:wmisaki@yahoo.com">wmisaki@yahoo.com</a>                                                                                          |
| <a href="mailto:samuelkyobe@gmail.com">samuelkyobe@gmail.com</a>                                                                                  |
| <a href="mailto:ritateresa.lawlor@univr.it">ritateresa.lawlor@univr.it</a>                                                                        |
|                                                                                                                                                   |
|                                                                                                                                                   |
|                                                                                                                                                   |

[Nicola.Mulder@uct.ac.za](mailto:Nicola.Mulder@uct.ac.za)  
[darrenpatrickmartin@gmail.com](mailto:darrenpatrickmartin@gmail.com)

[patterh@ufs.ac.za](mailto:patterh@ufs.ac.za)  
[fourie.joubert@up.ac.za](mailto:fourie.joubert@up.ac.za)  
[scott.hazelhurst@wits.ac.za](mailto:scott.hazelhurst@wits.ac.za)  
[faisal.mohamed@hotmail.com](mailto:faisal.mohamed@hotmail.com)  
[mibrahim@iend.org](mailto:mibrahim@iend.org)  
[oyekan.nash@gmail.com](mailto:oyekan.nash@gmail.com)  
[amansour@zu.edu.eg](mailto:amansour@zu.edu.eg)  
[samar\\_kassim@yahoo.com](mailto:samar_kassim@yahoo.com)  
[Dean.Everett@liverpool.ac.uk](mailto:Dean.Everett@liverpool.ac.uk)  
[cmsefula@medcol.mw](mailto:cmsefula@medcol.mw)  
[vjongene@illinois.edu](mailto:vjongene@illinois.edu)  
[sgaseitsiwe@bhp.org.bw](mailto:sgaseitsiwe@bhp.org.bw)  
[owusudabo@kccr.de](mailto:owusudabo@kccr.de)  
[petadonkor@yahoo.com](mailto:petadonkor@yahoo.com)  
[JBrandful@noguchi.ug.edu.gh](mailto:JBrandful@noguchi.ug.edu.gh)  
[AGhansah@noguchi.ug.edu.gh](mailto:AGhansah@noguchi.ug.edu.gh)  
[dmasiga@icipe.org](mailto:dmasiga@icipe.org)  
[AFischer@icipe.org](mailto:AFischer@icipe.org)  
[sdoumbi@icermali.org](mailto:sdoumbi@icermali.org)  
[yasmina@uom.ac.mu](mailto:yasmina@uom.ac.mu)  
[ookem@cermes.org](mailto:ookem@cermes.org)  
[ezeziel.adebiyi@covenantuniversity.edu.ng](mailto:ezekiel.adebiyi@covenantuniversity.edu.ng)  
[jkumuthini@gmail.com](mailto:jkumuthini@gmail.com)  
[o.tastanbishop@ru.ac.za](mailto:o.tastanbishop@ru.ac.za)  
[nicki@sanbi.ac.za](mailto:nicki@sanbi.ac.za)  
[junaid@sanbi.ac.za](mailto:junaid@sanbi.ac.za)  
[alan@sanbi.ac.za](mailto:alan@sanbi.ac.za)  
[nulenga@mdh-tz.org](mailto:nulenga@mdh-tz.org)  
[julie.makani@muhimbili-wellcome.org](mailto:julie.makani@muhimbili-wellcome.org)  
[slyantagaye@gmail.com](mailto:slyantagaye@gmail.com)  
[alia.benkahla@pasteur.rns.tn](mailto:alia.benkahla@pasteur.rns.tn)  
[jkayondo@uvri.go.ug](mailto:jkayondo@uvri.go.ug)  
[white@hsph.harvard.edu](mailto:white@hsph.harvard.edu)  
[hassan.ghazal@fulbrightmail.org](mailto:hassan.ghazal@fulbrightmail.org)  
[raoufalami@yahoo.com](mailto:raoufalami@yahoo.com)  
[fseghrouchni@yahoo.fr](mailto:fseghrouchni@yahoo.fr)  
[a.ibrahimi@um5s.net.ma](mailto:a.ibrahimi@um5s.net.ma)  
[amoussa@uae.ac.ma](mailto:amoussa@uae.ac.ma)

fouzia.radouani@pasteur.ma  
gabounf@gmail.com  
ksadki1@yahoo.fr

| Role within project            | Listed on Marker Paper | Access to data in H3ABioNet |
|--------------------------------|------------------------|-----------------------------|
|                                |                        |                             |
|                                |                        |                             |
| Principal investigator         | Yes                    |                             |
| Co-investigator                | Yes                    |                             |
| Study Coordinator              | Yes                    | Developed pilot da          |
| Project 1 Coordinator, Nigeria | Yes                    | Developed pilot da          |
| Co-investigator                | Yes                    |                             |
|                                |                        |                             |
| Principal investigator         | Yes                    |                             |
|                                | Yes                    |                             |
| Co-Investigator                | Yes                    |                             |
|                                |                        |                             |
| Principal investigator         | Yes                    |                             |
| Principal investigator         | Yes                    |                             |
| Principal investigator         | Yes                    |                             |

|                        |     |  |
|------------------------|-----|--|
| Principal investigator | Yes |  |
| Principal investigator | Yes |  |
| Principal investigator | Yes |  |
| Co-investigator        | Yes |  |

|                                      |     |                   |
|--------------------------------------|-----|-------------------|
| Overall Principal investigator       | Yes |                   |
| Overall Co-Principal Investigator    | Yes |                   |
| Co - Investigator                    | Yes | Phenomics core C  |
| Co - Investigator                    | Yes | Community Engag   |
| Site and Core Principal Investigator | Yes |                   |
| Co-Investigator                      | Yes | Community Engag   |
| Site Principal Investigator          | Yes |                   |
| Site Principal Investigator          | Yes |                   |
| Site and Core Principal Investigator | Yes |                   |
| Co - Investigator                    | Yes | Bioinformatics Co |
| Site Principal Investigator          | Yes |                   |

|                                                                                                                                                                                          |     |  |
|------------------------------------------------------------------------------------------------------------------------------------------------------------------------------------------|-----|--|
|                                                                                                                                                                                          |     |  |
| Principal investigator                                                                                                                                                                   | Yes |  |
| Co- Principal Investigator                                                                                                                                                               | Yes |  |
| Project Coordinator/Manager for Centre - Navrongo, Ghana - involved in the development of centre specific protocols from the beginning                                                   | Yes |  |
| Centre PI for Dikgale, South Africa                                                                                                                                                      | Yes |  |
| Biorepository Users WG, drafting of sample sharing policy                                                                                                                                | Yes |  |
| Phenotype Standards WG, metabolic disease expert                                                                                                                                         | Yes |  |
| Project Coordinator/Manager for Agincourt, South Africa - involved in the development of centre specific protocols and harmonization with other projects                                 | Yes |  |
| Senior Scientist: Bioinformaticist Lead PI Wits node of BioNet. Wrote part of the proposal and is developing the data management processes for AWI-Gen and H3A and is node PI for BioNet | Yes |  |
| Co-PI Agincourt SA, Board member INDEPTH                                                                                                                                                 | Yes |  |
| Centre PI & Project Coordinator - Nairobi, Kenya                                                                                                                                         | Yes |  |
| Genome Analysis WG co-chair, genomics expertise                                                                                                                                          | Yes |  |
| Centre PI for Soweto, expertise in phenotyping/ultrasound/epidemiology                                                                                                                   | Yes |  |

|                                                                                                                                              |     |  |
|----------------------------------------------------------------------------------------------------------------------------------------------|-----|--|
| Centre PI - Navrongo, Ghana                                                                                                                  | Yes |  |
| Ethics & Regulatory Issues WG, population genetics/genomics expertise. On the ethics WG and key contributor to policies                      | Yes |  |
| Project Coordinator/Manager - Nanoro, Burkina Faso - - involved in the development of centre specific protocols from the beginning           | Yes |  |
| Centre PI, Nanoro, Burkina Faso                                                                                                              | Yes |  |
| Centre PI, Agincourt, SA                                                                                                                     | Yes |  |
| Phenotype Standard WG, Questionnaire and measurement advisor - - involved in the development of centre specific protocols from the beginning | Yes |  |
|                                                                                                                                              |     |  |

|                             |     |                                                                          |
|-----------------------------|-----|--------------------------------------------------------------------------|
| Principal investigator      | Yes |                                                                          |
| Co-Principal Investigator   | Yes |                                                                          |
| Site Principal Investigator | Yes |                                                                          |
| Site Principal Investigator | Yes |                                                                          |
| Site Principal Investigator | Yes |                                                                          |
| Co-Principal Investigator   | Yes |                                                                          |
| Co-Principal Investigator   | Yes |                                                                          |
| Co-Principal Investigator   | yes | Major contribution of the conceptual development of the research project |

|                           |     |  |
|---------------------------|-----|--|
| Principal investigator    | Yes |  |
| Co-principal investigator | Yes |  |

|                        |     |  |
|------------------------|-----|--|
| Principal investigator | Yes |  |
| Co-investigator        | Yes |  |
| Co-investigator        | Yes |  |
| Research scientist     | Yes |  |
| Medical Director       | Yes |  |
| Medical Officer        | Yes |  |
| Medical Director       | Yes |  |
| Medical Director       | Yes |  |
| Research scientist     | Yes |  |
| Project Manager        | Yes |  |
| Data Manager           | Yes |  |
| Research scientist     | Yes |  |
| Research scientist     | Yes |  |
| Research scientist     | Yes |  |
| Research assistant     | Yes |  |

|                                                 |     |                    |
|-------------------------------------------------|-----|--------------------|
| Principal investigator                          | Yes |                    |
| co-Investigator/Cytogeneticist                  | Yes | Key to the project |
| co-Investigator/Geneticist                      | Yes | Key to project imp |
| co-Investigator/Consultant clinician/Genetician | Yes | Key to project imp |
| co-Investigator/Geneticist                      | Yes | Key to project imp |

|                                                          |                                          |                    |
|----------------------------------------------------------|------------------------------------------|--------------------|
| co-Investigator/Biochemist                               | Yes                                      | Key to project imp |
|                                                          |                                          |                    |
| Principal investigator                                   | Yes                                      |                    |
| Co-Principal investigator                                | Yes                                      |                    |
| Co-Principal investigator                                | Yes                                      |                    |
|                                                          |                                          |                    |
| Principal investigator                                   | Yes                                      |                    |
|                                                          |                                          |                    |
| Principal investigator                                   | Yes                                      |                    |
| Co-PI                                                    | Yes                                      |                    |
| <i>Site-PI</i>                                           | Yes, pending ethical approval from Walte |                    |
| <i>Site-PI</i>                                           | Yes, pending ethical approval from Rhode |                    |
| Principal investigator                                   | Yes                                      |                    |
| PI, geneticist                                           | Yes                                      |                    |
| PI                                                       | Yes                                      |                    |
|                                                          |                                          |                    |
|                                                          |                                          |                    |
| Principal investigator                                   | Yes                                      |                    |
| Co-PI                                                    | Yes                                      |                    |
| <i>Co-PI</i>                                             | Yes                                      |                    |
| <i>Co-PI</i>                                             | Yes                                      |                    |
| Co-PI                                                    | Yes                                      |                    |
| Co-PI                                                    | Yes                                      |                    |
| Major collaborator                                       | Yes                                      |                    |
| Major collaborator                                       | Yes                                      |                    |
|                                                          |                                          |                    |
|                                                          |                                          |                    |
| Principal investigator                                   | Yes                                      |                    |
| Co-investigator, Operational manager                     | Yes                                      |                    |
| Co-investigator, haematopathologist                      | Yes                                      |                    |
| Research scientist, biorepository technical operations   | Yes                                      |                    |
| Collaborator, Bioinformatics support                     | Yes                                      |                    |
| Collaborator, iPSC and Room Temperature Storage studies. | Yes                                      |                    |
|                                                          |                                          |                    |
| Principal investigator                                   | Yes                                      |                    |

|                                 |     |                      |
|---------------------------------|-----|----------------------|
| Consultant                      | Yes | Played a significant |
| Manager                         | Yes | Played a significant |
|                                 |     |                      |
| Principal investigator          | Yes |                      |
| Operation and Technical Advisor | Yes |                      |
| Project Manager                 | Yes |                      |
|                                 |     |                      |
| Principal investigator          | Yes |                      |
| Co-Investigator                 | Yes |                      |
| Co-Investigator/Coordinator     | Yes |                      |
| Collaborator/Consultant         | Yes |                      |

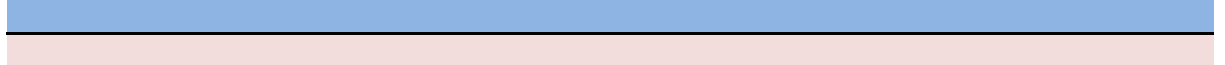

|                        |               |         |
|------------------------|---------------|---------|
| Principal investigator | Partial       | Yes     |
| Co-PI                  | Nil           | Yes     |
| PI                     | Partial       | Yes     |
| PI                     | Nil           | Yes     |
| PI                     | Nil           | Yes     |
| PI                     | Partial       | Yes     |
| Co-PI                  | Nil           | Yes     |
| PI                     | Partial (20%) | Yes     |
| PI                     | Funded fully  | Yes     |
| Co-PI                  | Funded fully  | Yes     |
| PI                     | Partial       | Yes     |
| Co-PI                  | Partial       | Yes     |
| PI                     | Nil           | Yes     |
| PI                     | Partial       | Yes     |
| PI                     | Partial       | Yes     |
| Co-PI                  | Partial       | Yes     |
| PI                     | Partial       | Yes     |
| Co-PI                  | Partial       | Yes     |
| PI                     | Partial       | Yes     |
| Co-PI                  | Partial       | Yes     |
| PI                     | Partial       | Yes     |
| PI                     | Nil           | Yes     |
| PI                     | Nil           | Yes     |
| PI                     | Nil           | Yes     |
| PI                     | Partial       | Yes     |
| PI                     | Nil           | Yes     |
| PI                     | Partial       | Yes     |
| Co-PI                  | Partial       | Yes     |
| Co-PI                  | Nil           | Yes     |
| PI                     |               | 20% Yes |
| PI                     | Nil           | Yes     |
| PI                     | Nil           | Yes     |
| PI                     | Nil           | Yes     |
| PI                     | Partial       | Yes     |
| PI                     | Partial       | Yes     |
| PI                     | Nil           | Yes     |

PI  
PI  
PI

Nil  
Nil  
Nil

Yes  
Yes  
Yes



PI

Adebamowo, Clement  
Adebamowo, Clement  
Adebamowo, Clement  
Adebamowo, Clement  
Adebamowo, Clement

Adu, Dwomoa  
Adu, Dwomoa

Anabwani, Gabriel  
Anabwani, Gabriel  
Anabwani, Gabriel



|                  |
|------------------|
| Ramsay, Michele  |
|                  |
| Affolabi, Dissou |
|                  |
| Affolabi, Dissou |
|                  |
| Ameni, Gobena    |
| Ameni, Gobena    |
|                  |
| Happi, Christian |
|                  |
| Landoure, Guida  |

|                   |
|-------------------|
| Landoure, Guida   |
|                   |
| Nicol, Mark       |
| Nicol, Mark       |
| Nicol, Mark       |
|                   |
| Patterson, Hugh   |
|                   |
| Stein, Dan        |
|                   |
|                   |
| Wonkam, Ambroise  |
|                   |
|                   |
| Abayomi, Akin     |
|                   |
| Abimiku, Alash'le |



|                |
|----------------|
| Mulder, Nicola |
| Mulder, Nicola |
| Mulder, Nicola |

| <b>Project Member Surname</b>                             | <b>First name</b>  | <b>Institution as should be listed on Marker Paper</b>                              |
|-----------------------------------------------------------|--------------------|-------------------------------------------------------------------------------------|
| <b>TrypanoGEN</b>                                         |                    |                                                                                     |
| Matovu                                                    | Enock              | Makerere University, Uganda                                                         |
| Bucheton                                                  | Bruno              | IRD, France                                                                         |
| Chisi                                                     | John               | University of Malawi                                                                |
| Enyaru                                                    | John               | Makerere University, Uganda                                                         |
| Hertz-Fowler                                              | Christiane         | University of Liverpool, UK                                                         |
| Koffi                                                     | Mathurin           | Universite Jean L Guede, Cote d'Ivoire                                              |
| Macleod                                                   | Annette            | University of Glasgow                                                               |
| Mumba                                                     | Dieuodonne         | INRB, DR Congo                                                                      |
| Sidibe                                                    | Issa               | CIRDES, Burkina faso                                                                |
| Simo                                                      | Gustave            | University of Dschang, Cameroon                                                     |
| Simuunza                                                  | Martin             | University of Zambia                                                                |
| <b>The RHDGen Network</b>                                 |                    |                                                                                     |
| Mayosi                                                    | Bongani            | University of Cape Town, South Africa                                               |
| Ramesar                                                   | Rajkumar           | University of Cape Town, South Africa                                               |
| Mulder                                                    | Nicola             | University of Cape Town, South Africa                                               |
| Ogendo                                                    | Stephen            | University of Nairobi, Kenya                                                        |
| Mocumbi                                                   | Ana Olga           | Instituto Nacional de Saude, Mozambique                                             |
| Hugo-Hamman                                               | Christopher        | Windhoek central Hospital, Namibia                                                  |
| Ogah                                                      | Okechukwu          | University College Hospital, Ibadan, Nigeria                                        |
| El Sayed                                                  | Ahmed              | Alzaeim Alazhari University, Sudan                                                  |
| Mondo                                                     | Charles            | Mulago Hospital, Kampala, Uganda                                                    |
| Musuku                                                    | John               | University of Zambia, Zambia                                                        |
| Engel                                                     | Mark               | University of Cape Town, South Africa                                               |
| De Vries                                                  | Jantina            | University of Cape Town, South Africa                                               |
| Lesosky                                                   | Maia               | University of Cape Town, South Africa                                               |
| Shaboodien                                                | Gasnat             | University of Cape Town, South Africa                                               |
| Cordell                                                   | Heather            | University of Newcastle-upon-Tyne, UK                                               |
| Pare                                                      | Guillaume          | McMaster University, Canada                                                         |
| Keavney                                                   | Bernard            | University of Manchester, UK                                                        |
| <b>Aetiology of type 2 diabetes in sub-Saharan Africa</b> |                    |                                                                                     |
| <b>Motala</b>                                             | <b>Ayesha</b>      | Nelson R Mandela School of Medicine, University of KwaZulu-Natal, Durban            |
| <b>Sobngwi</b>                                            | <b>Eugene</b>      | Health of Populations in Transition, University of Yaoundé 2                        |
| <b>Mbanya</b>                                             | <b>Jean Claude</b> | Health of Populations in Transition, University of Yaoundé 2                        |
| <b>Hennig</b>                                             | <b>Branwen</b>     | MRC Keneba, The Gambia and University of The Gambia                                 |
| <b>Balde</b>                                              | <b>Naby</b>        | CHU Donka, University of Conakry, Non Communicable Disease Unit, Ministry of Health |
| <b>Nyirenda</b>                                           | <b>Moffat</b>      | Malawi-Liverpool-Wellcome Trust Unit, Blantyre                                      |

|                  |                  |                                                                                                                                                                                              |
|------------------|------------------|----------------------------------------------------------------------------------------------------------------------------------------------------------------------------------------------|
| <b>Oli</b>       | <b>John</b>      | University of Nigeria Teaching Hospital, Enugu                                                                                                                                               |
| <b>Adebamowo</b> | <b>Clement</b>   | Institute of Human Virology, Abuja                                                                                                                                                           |
| <b>Levitt,</b>   | <b>Naomi</b>     | Faculty of Health Sciences, University of Cape Town                                                                                                                                          |
| <b>Mayige</b>    | <b>Mary</b>      | National Institute for Medical Research, Dar es Salaam, Hindu Mandal Hospital, Muhimbili University of Health and Allied Sciences, Muhimbili National Hospital, and Nelson Mandela Institute |
| <b>Kapiga,</b>   | <b>Saidi</b>     | Mwanza Intervention Trials Unit/NIMR Tanzania                                                                                                                                                |
| <b>Kaleebu</b>   | <b>Pontiano</b>  | MRC/UVRI Unit Uganda; Makerere University                                                                                                                                                    |
| <b>Sandhu</b>    | <b>Manjinder</b> | Cambridge University; Wellcome Trust Sanger Institute; MRC Epidemiology Unit, Cambridge                                                                                                      |
| <b>Smeeth</b>    | <b>Liam</b>      | London School of Hygiene and Tropical Medicine                                                                                                                                               |
| <b>McCarthy</b>  | <b>Mark</b>      | Oxford Centre for Diabetes, Endocrinology and Metabolism, University of Oxford and Wellcome Trust Centre for Human Genetics, Univ of Oxford                                                  |
| <b>Rotimi</b>    | <b>Charles</b>   | Center for Research on Genomics and Global Health, National Human Genome Research Institute, National Institutes of Health, Bethesda, MD, USA                                                |



| Contact email                                                                                                                         | Role within project                     |
|---------------------------------------------------------------------------------------------------------------------------------------|-----------------------------------------|
| <a href="mailto:matovue@vetmed.mak.ac.ug">matovue@vetmed.mak.ac.ug</a> , <a href="mailto:matovue04@yahoo.com">matovue04@yahoo.com</a> | Principal investigator                  |
| <a href="mailto:bruno.bucheton@ird.fr">bruno.bucheton@ird.fr</a>                                                                      | Collaborator*                           |
| <a href="mailto:jchisi@medcol.mw">jchisi@medcol.mw</a>                                                                                | Co-PI                                   |
| <a href="mailto:jenyaru@gmail.com">jenyaru@gmail.com</a> , <a href="mailto:jenyaru@sci.mak.ac.ug">jenyaru@sci.mak.ac.ug</a>           | Co-PI                                   |
| <a href="mailto:chf@liv.ac.uk">chf@liv.ac.uk</a> , <a href="mailto:C.Hertz-Fowler@liverpool.ac.uk">C.Hertz-Fowler@liverpool.ac.uk</a> | Collaborator*                           |
| <a href="mailto:m9koffi@yahoo.fr">m9koffi@yahoo.fr</a>                                                                                | Co-PI                                   |
| <a href="mailto:annette.macleod@glasgow.ac.uk">annette.macleod@glasgow.ac.uk</a>                                                      | Collaborator*                           |
| <a href="mailto:mumbadieudonne@yahoo.fr">mumbadieudonne@yahoo.fr</a>                                                                  | Co-PI                                   |
| <a href="mailto:isidibe@hotmail.com">isidibe@hotmail.com</a> , <a href="mailto:sambo@fasonet.bf">sambo@fasonet.bf</a>                 | Co-PI                                   |
| <a href="mailto:gsimoca@yahoo.fr">gsimoca@yahoo.fr</a>                                                                                | Co-PI                                   |
| <a href="mailto:martin.simuunza@unza.zm">martin.simuunza@unza.zm</a>                                                                  | Co-PI                                   |
| <a href="mailto:bongani.mayosi@uct.ac.za">bongani.mayosi@uct.ac.za</a>                                                                | Principal investigator                  |
| <a href="mailto:raj.ramesar@uct.ac.za">raj.ramesar@uct.ac.za</a>                                                                      | Co-Principal Investigator               |
| <a href="mailto:nicola.mulder@uct.ac.za">nicola.mulder@uct.ac.za</a>                                                                  | Co-Principal Investigator               |
| <a href="mailto:swoogendo@gmail.com">swoogendo@gmail.com</a>                                                                          | Principal investigator at research site |
| <a href="mailto:amocumbi@yahoo.com">amocumbi@yahoo.com</a>                                                                            | Principal investigator at research site |
| <a href="mailto:christopher.hugo@medinet.co.za">christopher.hugo@medinet.co.za</a>                                                    | Principal investigator at research site |
| <a href="mailto:osogah56156@yahoo.com">osogah56156@yahoo.com</a>                                                                      | Principal investigator at research site |
| <a href="mailto:asaelsayed@hotmail.com">asaelsayed@hotmail.com</a>                                                                    | Principal investigator at research site |
| <a href="mailto:charlesmondo2011@gmail.com">charlesmondo2011@gmail.com</a>                                                            | Principal investigator at research site |
| <a href="mailto:jmusuku2001@yahoo.co.uk">jmusuku2001@yahoo.co.uk</a>                                                                  | Principal investigator at research site |
| <a href="mailto:mark.engel@uct.ac.za">mark.engel@uct.ac.za</a>                                                                        | Co-Principal Investigator               |
| <a href="mailto:jantina.devries@uct.ac.za">jantina.devries@uct.ac.za</a>                                                              | Co-Principal Investigator               |
| <a href="mailto:maia.lesosky@uct.ac.za">maia.lesosky@uct.ac.za</a>                                                                    | Co-Principal Investigator               |
| <a href="mailto:gasnat.shaboodien@uct.ac.za">gasnat.shaboodien@uct.ac.za</a>                                                          | Co-Principal Investigator               |
| <a href="mailto:heather.cordell@newcastle.ac.uk">heather.cordell@newcastle.ac.uk</a>                                                  | Co-Principal Investigator               |
| <a href="mailto:pareg@mcmaster.ca">pareg@mcmaster.ca</a>                                                                              | Co-Principal Investigator               |
| <a href="mailto:bernard.keavney@manchester.ac.uk">bernard.keavney@manchester.ac.uk</a>                                                | Co-Principal Investigator               |
| <a href="mailto:motala@ukzn.ac.za">motala@ukzn.ac.za</a>                                                                              | Principal investigator, South Africa    |
| <a href="mailto:sobngwieugene@yahoo.fr">sobngwieugene@yahoo.fr</a>                                                                    | Site PI, Cameroon                       |
| <a href="mailto:jcmbanya@yahoo.co.uk">jcmbanya@yahoo.co.uk</a>                                                                        | Senior Management Team                  |
| <a href="mailto:Branwen.Hennig@lshtm.ac.uk">Branwen.Hennig@lshtm.ac.uk</a>                                                            | Site PI, Gambia                         |
| <a href="mailto:baldenaby@yahoo.com">baldenaby@yahoo.com</a>                                                                          | Site PI, Guinea                         |
| <a href="mailto:mnyirenda@mlw.medcol.mw">mnyirenda@mlw.medcol.mw</a>                                                                  | Site PI, Malawi                         |

|                                                                                    |                                    |
|------------------------------------------------------------------------------------|------------------------------------|
| <a href="mailto:johnnieoli@hotmail.com">johnnieoli@hotmail.com</a>                 | Site PI, Nigeria                   |
| <a href="mailto:CAdebamowo@ihv.umaryland.edu">CAdebamowo@ihv.umaryland.edu</a>     | Site PI, Nigeria                   |
| <a href="mailto:naomi.levitt@uct.ac.za">naomi.levitt@uct.ac.za</a>                 | Site PI, South Africa              |
| <a href="mailto:mary.mayige@newcastle.ac.uk">mary.mayige@newcastle.ac.uk</a>       | Site PI, Tanzania                  |
| <a href="mailto:Saidi.Kapiga@lshtm.ac.uk">Saidi.Kapiga@lshtm.ac.uk</a>             | Site PI, Tanzania                  |
| <a href="mailto:Pontiano.Kaleebu@mrcuganda.org">Pontiano.Kaleebu@mrcuganda.org</a> | Site PI, Uganda                    |
| <a href="mailto:ms23@sanger.ac.uk">ms23@sanger.ac.uk</a>                           | Coinvestigator, Scientific support |
| <a href="mailto:Liam.Smeeth@lshtm.ac.uk">Liam.Smeeth@lshtm.ac.uk</a>               | Coinvestigator, Scientific support |
| <a href="mailto:mark.mccarthy@drl.ox.ac.uk">mark.mccarthy@drl.ox.ac.uk</a>         | Coinvestigator, Scientific support |
| <a href="mailto:rotimic@mail.nih.gov">rotimic@mail.nih.gov</a>                     | Coinvestigator, Scientific support |

| Listed on<br>Marker<br>Paper |
|------------------------------|
|------------------------------|

|  |
|--|
|  |
|--|

|     |
|-----|
| Yes |
|-----|

|  |
|--|
|  |
|--|

|     |
|-----|
| Yes |
|-----|

|  |
|--|
|  |
|--|

|     |
|-----|
| Yes |
|-----|

|  |
|--|
|  |
|--|

|     |
|-----|
| Yes |
|-----|

|     |
|-----|
| Yes |
|-----|

|  |
|--|
|  |
|--|

|     |
|-----|
| Yes |
|-----|

|  |
|--|
|  |
|--|

|     |
|-----|
| Yes |
|-----|

|  |
|--|
|  |
|--|

|     |
|-----|
| Yes |
|-----|

|  |
|--|
|  |
|--|

|     |
|-----|
| Yes |
|-----|

|  |
|--|
|  |
|--|

|     |
|-----|
| Yes |
|-----|

|  |
|--|
|  |
|--|

|     |
|-----|
| Yes |
|-----|

|  |
|--|
|  |
|--|

|     |
|-----|
| Yes |
|-----|

|     |
|-----|
| Yes |
| Yes |
| Yes |
|     |
| Yes |
|     |
| Yes |
|     |
| Yes |

| <b>Project Member<br/>Surname</b>    | <b>First name</b> |
|--------------------------------------|-------------------|
| <b>National Institutes of Health</b> |                   |
| Derr                                 | Leslie            |
| Guyer                                | Mark              |
| Lehner                               | Thomas            |
| Madden                               | Ebony             |
| Nguyen                               | Anh Quynh         |
| Penno                                | Sue               |
| Troyer                               | Jennifer          |
| Wideroff                             | Louise            |
| <b>Wellcome Trust</b>                |                   |
| Bethke                               | Lara              |
| Duncanson                            | Audrey            |
| Littler                              | Katherine         |

| Institution as should be listed on Marker Paper                              | Contact email                    |
|------------------------------------------------------------------------------|----------------------------------|
| Common Fund, Office of Strategic Coordination, National Institutes of Health | leslie.derr@nih.                 |
| National Human Genome Research Institute, National Institutes of Health      | guyerm@excha                     |
| National Institute of Mental Health, National Institutes of Health           | tlehner@mail.ni                  |
| National Human Genome Research Institute, National Institutes of Health      | ebony.madden@                    |
| National Human Genome Research Institute, National Institutes of Health      | anhquynh.nguye                   |
| National Human Genome Research Institute, National Institutes of Health      | mpenno1@ME.                      |
| National Human Genome Research Institute, National Institutes of Health      | <a href="#">Jennifer.Troyer@</a> |
| National Eye Institute, National Institutes of Health                        | Louise.Wideroff                  |
| The Wellcome Trust                                                           | l.bethke@wellcc                  |
| The Wellcome Trust                                                           | a.duncanson@v                    |
| The Wellcome Trust                                                           | k.littler@wellcon                |

| Role within project | Listed on<br>Marker<br>Paper |
|---------------------|------------------------------|
|                     |                              |
| Funding agency      | Yes                          |
|                     |                              |
| Funding agency      | Yes                          |
| Funding agency      | Yes                          |
| Funding agency      | Yes                          |
